# Supplementary material for: Mechanistic Insights into Palladium(II)-Catalyzed Carboxylation of Thiophene and Carbon Dioxide
Source: MDPI journal article supplement (doi:10.3390/catal12060654), 2022-06-14
Supplement: s1 [file s1]

Archive with 1 entries (1 files):
- catalysts-1701152-supplementary.pdf
